# Supplementary material for: Yolk–shell structured FeS/MoS2@nitrogen-doped carbon nanocubes with sufficient internal void space as an ultrastable anode for potassium-ion batteries
Source: Royal Society of Chemistry journal article supplement (doi:10.1039/d0ta06588a), 2020-01-01
Supplement: d0ta06588a1.pdf [file d0ta06588a1.pdf]

## Supporting Information for

### **Yolk–Shell Structured FeS/MoS<sub>2</sub>@Nitrogen-Doped Carbon Nanocubes with Sufficient Internal Void Space as an Ultrastable Anodes for Potassium-Ion Batteries**

Jianhua Chu,<sup>a</sup> Qiyao Yu,<sup>\*b</sup> Kun Han,<sup>a</sup> Lidong Xing,<sup>a</sup> Chao Gu,<sup>a</sup> Ying Li,<sup>b</sup> Yanping Bao,<sup>\*a</sup> and Wei (Alex) Wang<sup>c</sup>

<sup>a</sup> *State Key Laboratory of Advanced Metallurgy, University of Science and Technology Beijing, Beijing 100083, China. Email: baoyp@ustb.edu.cn*

<sup>b</sup> *Institute of Advanced Structure Technology, Beijing Institute of Technology, Beijing 100081, China. Email: qiyaoyu@bit.edu.cn*

<sup>c</sup> *Beijing Key Laboratory of Bio-inspired Energy Materials and Devices, School of Space and Environment, Beihang University, Beijing 100191, China*

† Electronic supplementary information (ESI) available. See DOI: xxxxxxxx

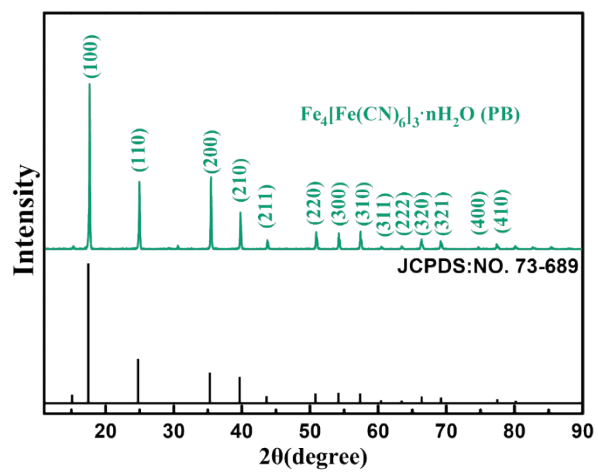

**Fig. S1** XRD patterns of Prussian Blue nanocubes.

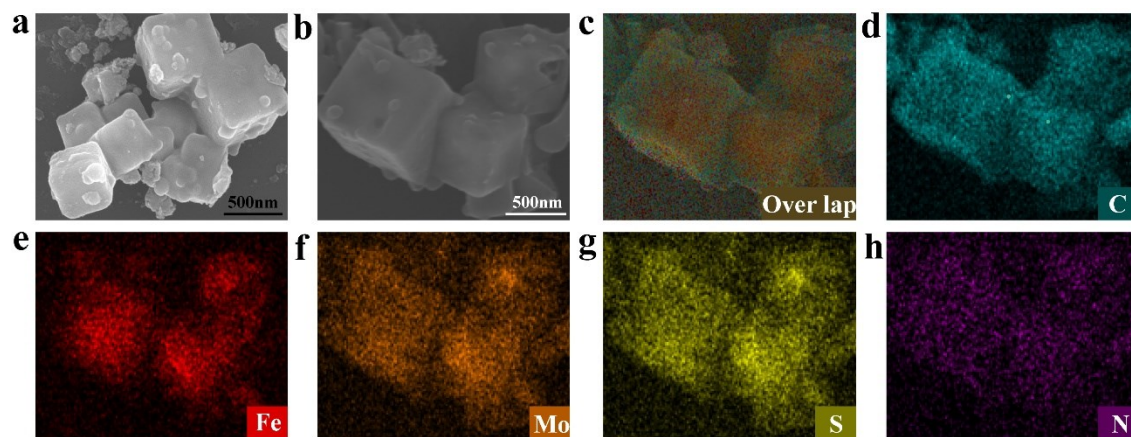

**Fig. S2** (a-b) FESEM image and corresponding (c-h) EDS mappings of the as-synthesized FMC.

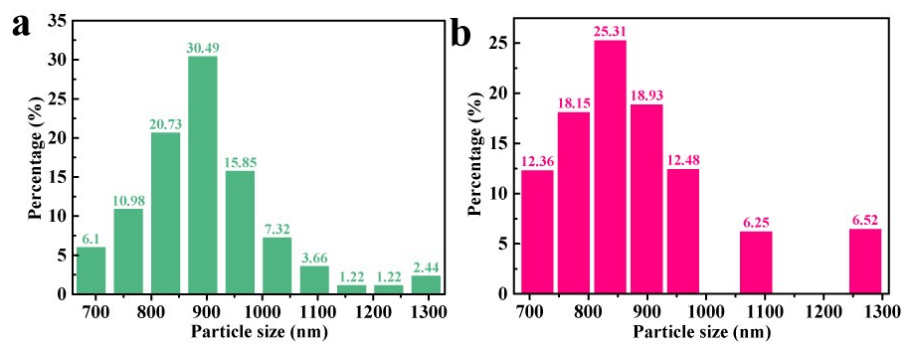

**Fig. S3** The size distribution of (a) PB and (b) FMC.

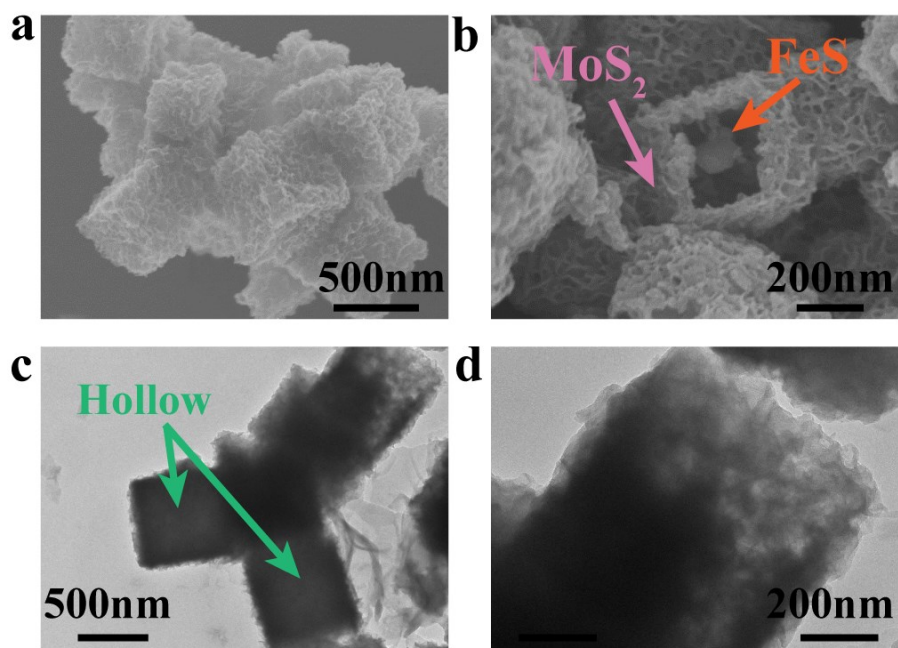

**Fig. S4** (a, b) FESEM and (c, d) TEM images of FMCM.

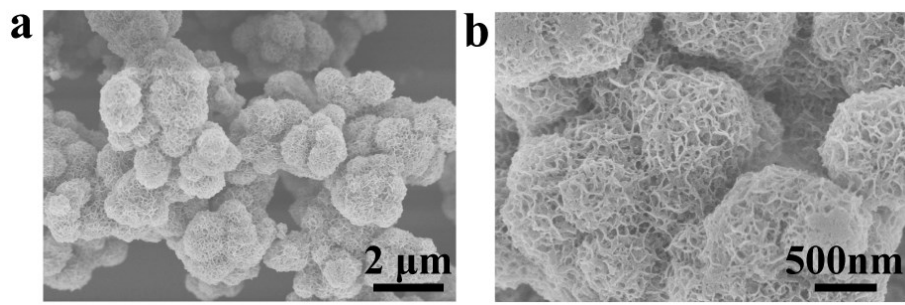

**Fig. S5** FESEM images of MS2.

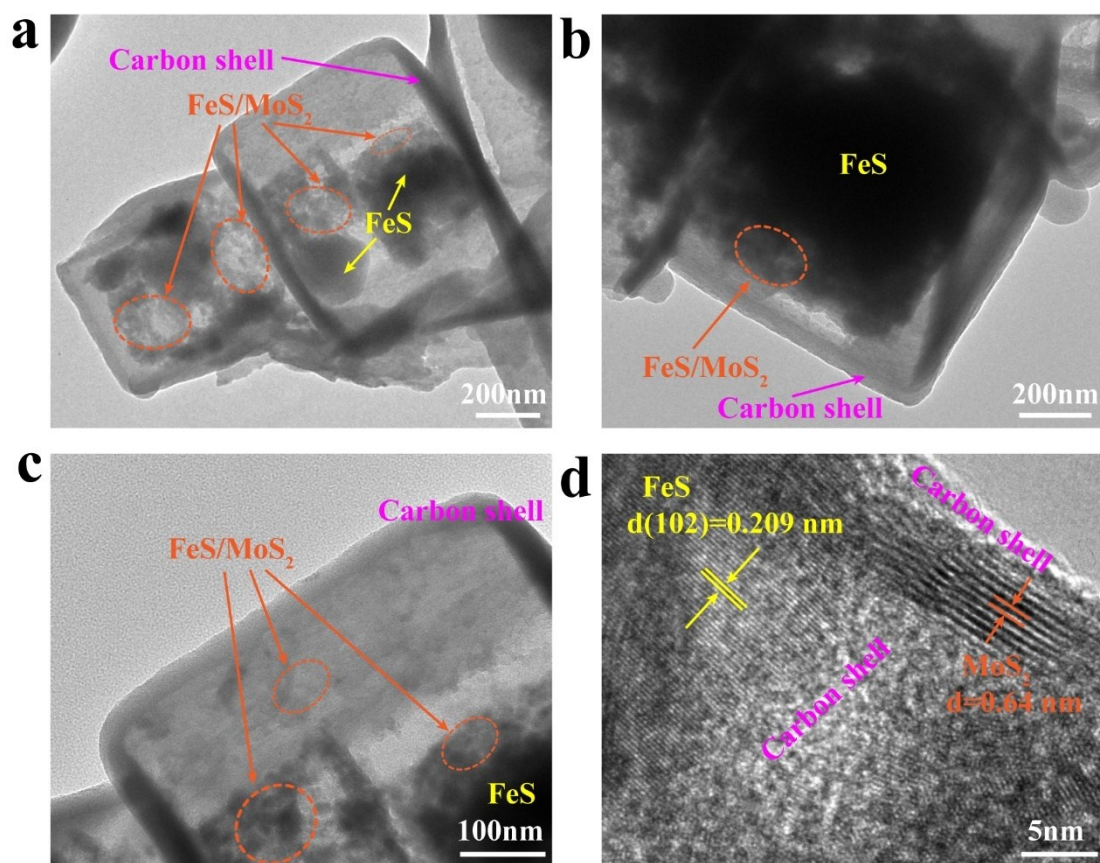

**Fig. S6** (a-c) TEM and (d) HRTEM images of the as-synthesized FMC.

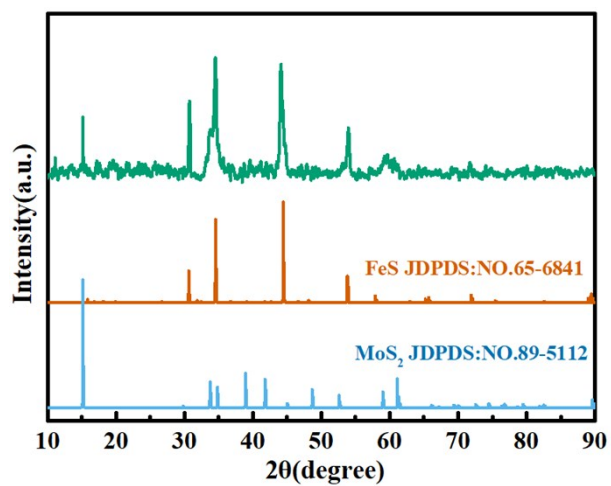

**Fig. S7** XRD patterns of FMCM.



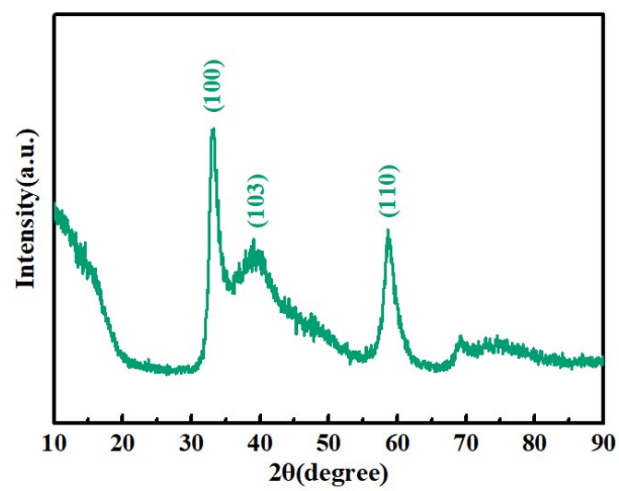

**Fig. S8** XRD patterns of MS2.

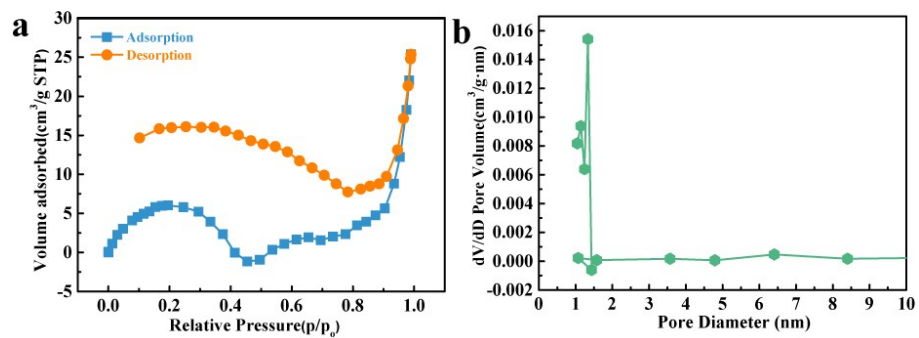

**Fig. S9** (a) N<sub>2</sub> adsorption–desorption isotherms and (b) corresponding pore size distribution of FMCM.

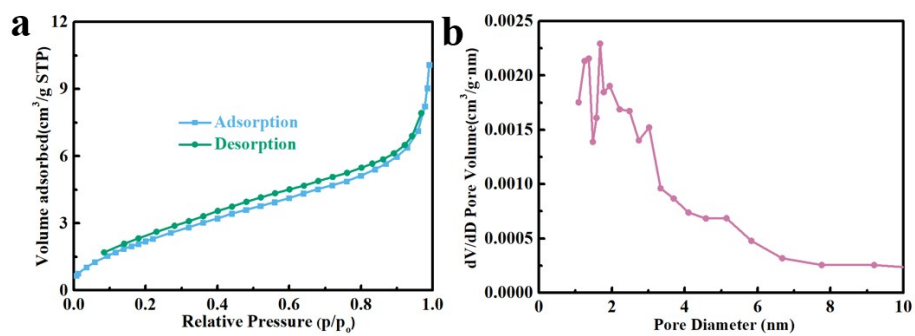

**Fig. S10** (a) N<sub>2</sub> adsorption isotherms and (b) corresponding pore size distribution of PB.

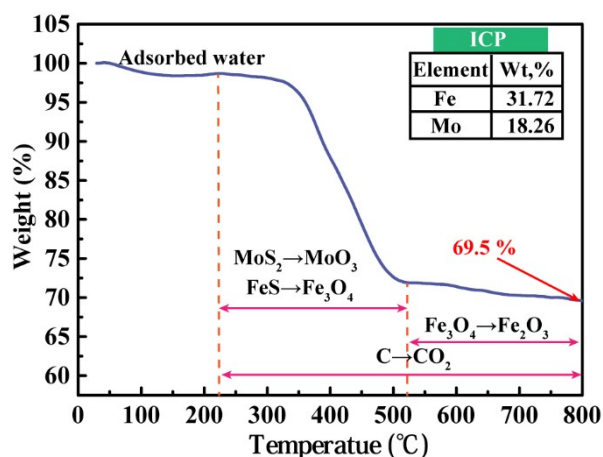

**Fig. S11** Thermogravimetric curve of FMC thermally treated in air with a heating rate of  $10\text{ }^{\circ}\text{C min}^{-1}$  from room temperature to  $800\text{ }^{\circ}\text{C}$  and ICP data of FMC (insert of figure).

**Calculation details:** The weight loss between  $250\text{--}550\text{ }^{\circ}\text{C}$  results from the oxidation of  $\text{MoS}_2$  and  $\text{FeS}$  into  $\text{MoO}_3$  and  $\text{Fe}_3\text{O}_4$ . The  $\text{Fe}_3\text{O}_4$  was completely converted into  $\text{Fe}_2\text{O}_3$  and N-doping carbon shell was completely decomposed when the temperature rises to  $800\text{ }^{\circ}\text{C}$ . Thus, the remaining mass (69.5%) is attributed to stable oxidation states of  $\text{MoO}_3$  and  $\text{Fe}_2\text{O}_3$ . According to the results of ICP (insert of Fig. S11), the atomic ratio of Fe and Mo in FMC is 2.98:1. Thus, the 65.7 wt% product includes 42.87 wt%  $\text{Fe}_2\text{O}_3$  and 26.63 wt%  $\text{MoO}_3$  calculated by the following equation.

$$w_{\text{Fe}_2\text{O}_3} = \frac{\frac{2.98}{2} \times M_{\text{Fe}_2\text{O}_3}}{\frac{2.98}{2} \times M_{\text{Fe}_2\text{O}_3} + 1 \times M_{\text{MoO}_3}}$$

Further, 42.87 wt%  $\text{Fe}_2\text{O}_3$  corresponds to 47.16 wt%  $\text{FeS}$  according to the equation:

$$w_{\text{FeS}} = \frac{w_{\text{Fe}_2\text{O}_3} \times 2M_{\text{FeS}}}{M_{\text{Fe}_2\text{O}_3}}$$

Similarly, 26.63 wt%  $\text{MoO}_3$  corresponds to 28.79 wt%  $\text{FeS}$ . Finally, the content of the carbon component was calculated to be ca. 24.05 wt%.

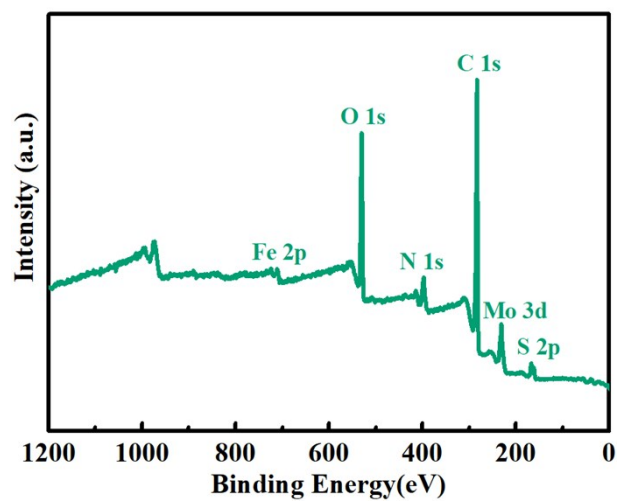

**Fig. S12** XPS survey spectrum of the FMC composite.

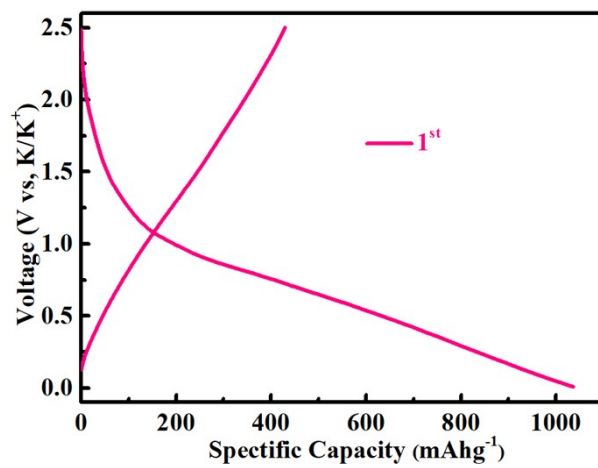

**Fig. S13** The initial charge and discharge profiles of FMC composites at 100 mA g<sup>-1</sup>.

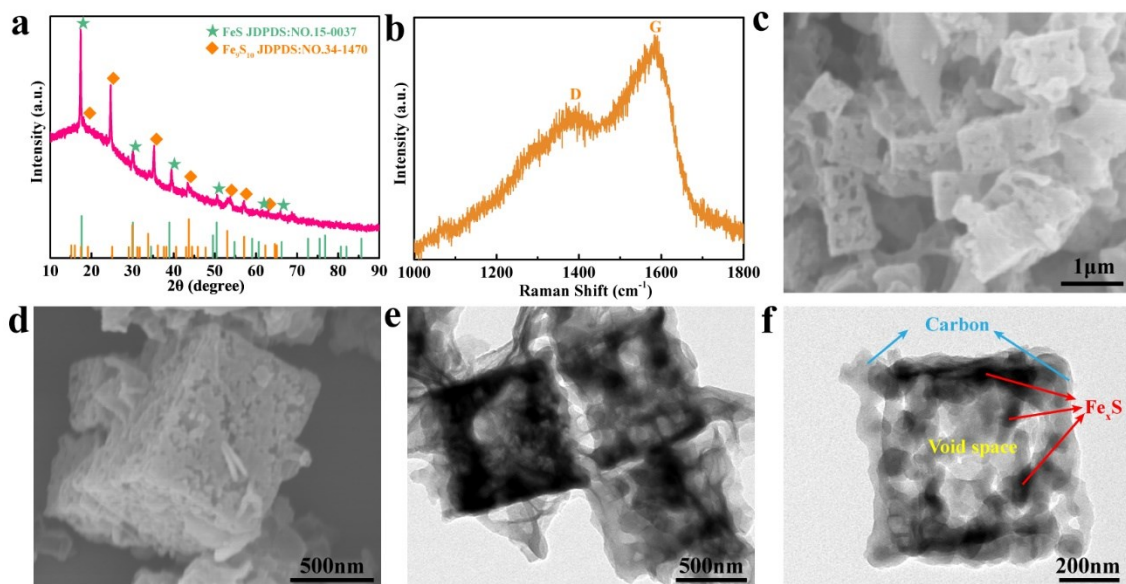

**Fig. S14** (a) XRD pattern, (b) Raman spectrum, (c-d) FESEM images and (e-f) TEM images of the as-synthesized Y-S  $\text{Fe}_x\text{S}@C$ .

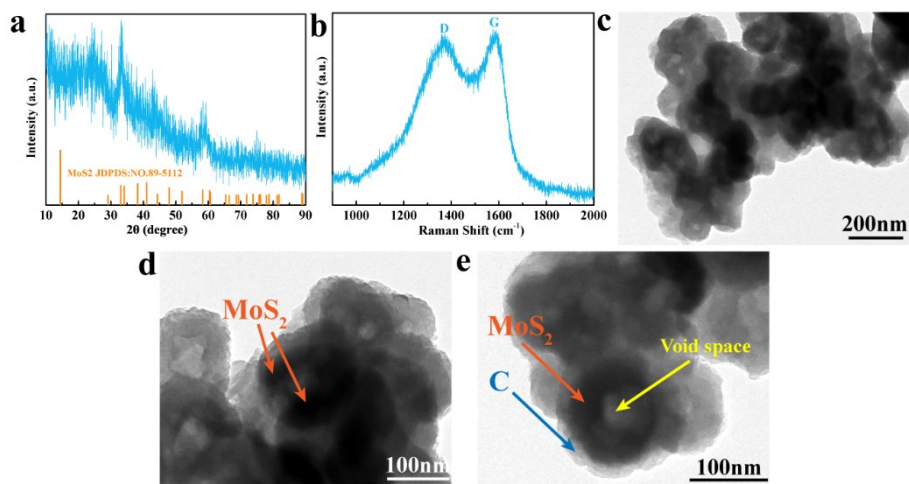

**Fig. S15** (a) XRD pattern, (b) Raman spectra and (c-d) TEM images of the as-synthesized Y-S MoS<sub>2</sub>@C.



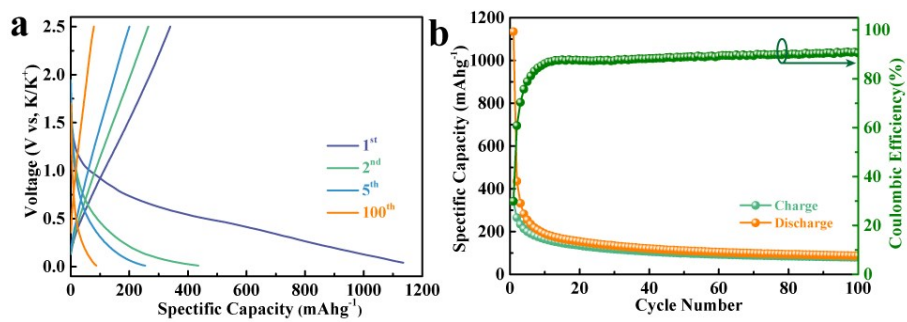

**Fig. S16** (a) Charge–discharge voltage profiles from the 1st to 100th cycle and (b) cycle performance of the Y-S Fe<sub>x</sub>S@C at 100 mA g<sup>-1</sup>.

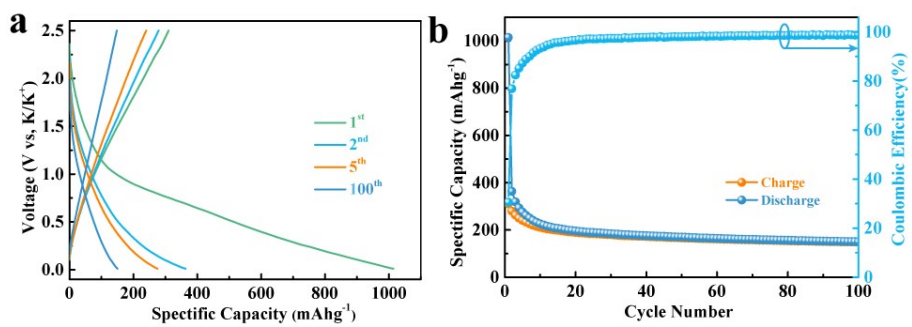

**Fig. S17** (a) Charge–discharge voltage profiles from the 1st to 100th cycle and (b) cycle performance of the Y-S MoS<sub>2</sub>@C at 100 mA g<sup>-1</sup>.

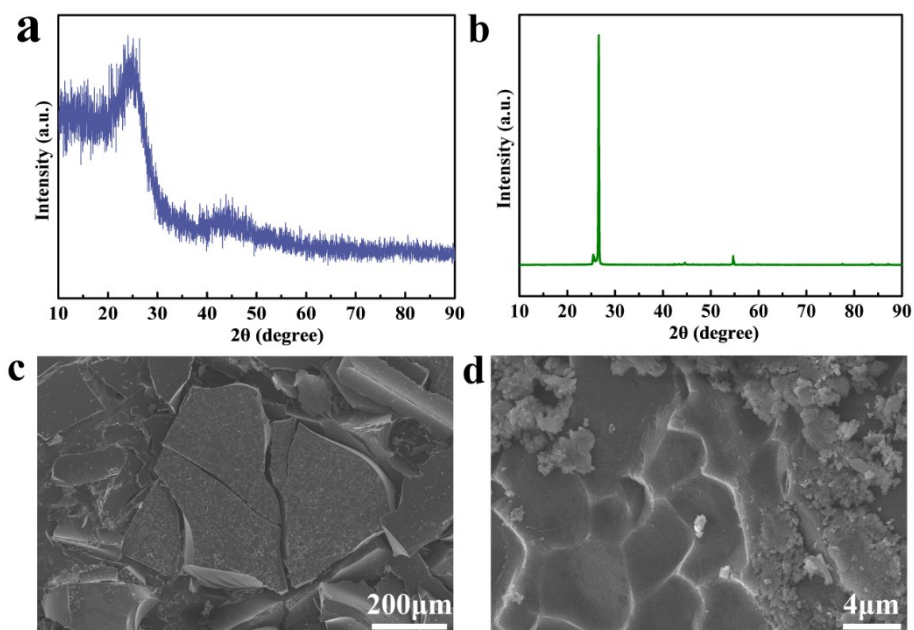

**Fig. S18** XRD pattern of (a) N-doped carbon and (b) commercial graphite. (c-d) SEM image of the as-synthesized N-doped carbon.

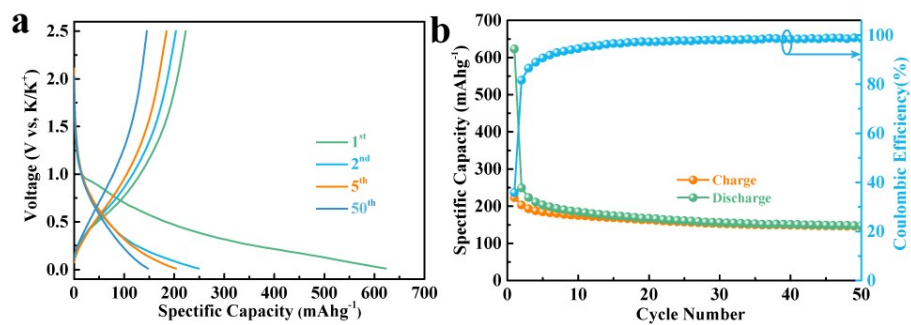

**Fig. S19** (a) Charge–discharge voltage profiles from the 1st to 50th cycle and (b) cycle performance of N-doped carbon at 100 mA g<sup>-1</sup>.

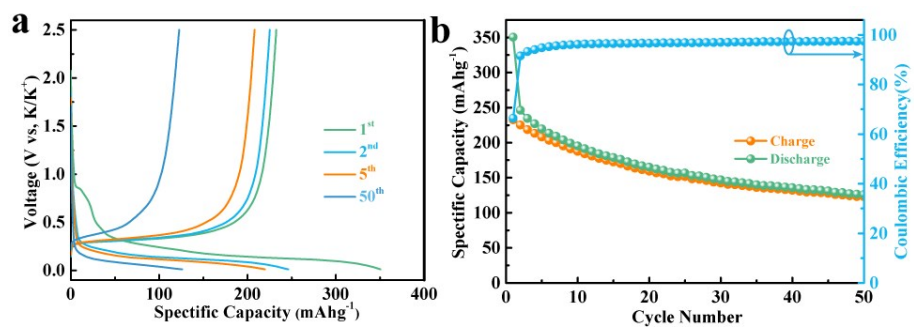

**Fig. S20** (a) Charge–discharge voltage profiles from the 1st to 50th cycle and (b) cycle performance of commercial graphite at 100 mA g<sup>-1</sup>.

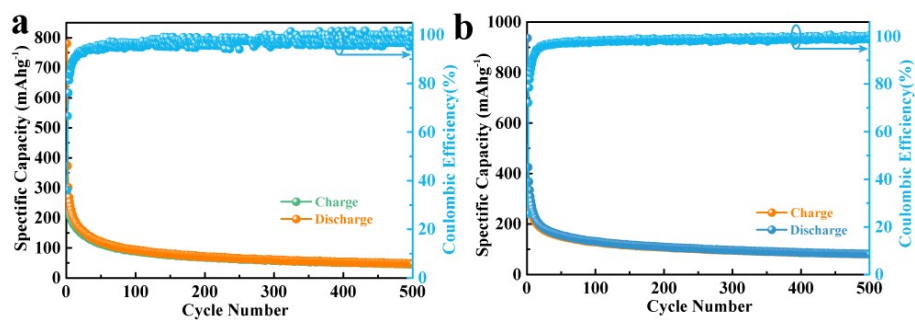

**Fig. S21** Long-term cycling performances of the Y-S  $\text{Fe}_x\text{S}@C$  and (g) Y-S  $\text{MoS}_2@C$  electrodes at a current density of  $1000 \text{ mA g}^{-1}$ .

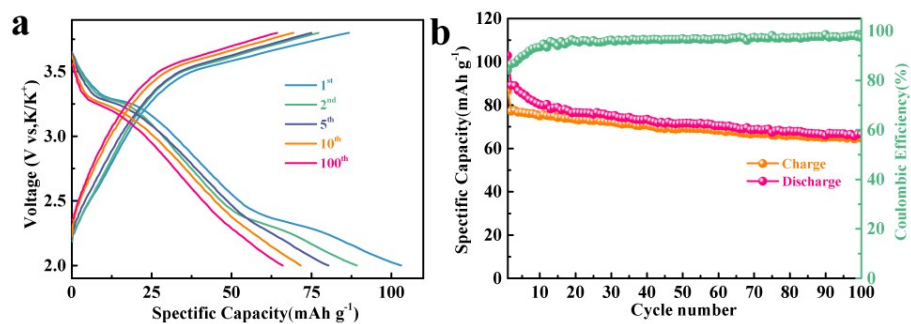

**Fig. S22** Electrochemical performance of an FMC// K<sub>4</sub>Fe(CN)<sub>6</sub> (KPB) K-ion full battery. (a) The 1<sup>st</sup>, 2<sup>nd</sup>, 5<sup>th</sup>, 10<sup>th</sup> and 100<sup>th</sup> charge/discharge profiles and (b) cycling performance of the K-ion full battery at 50 mA g<sup>-1</sup> with the voltage range from 2.0 to 3.8 V.

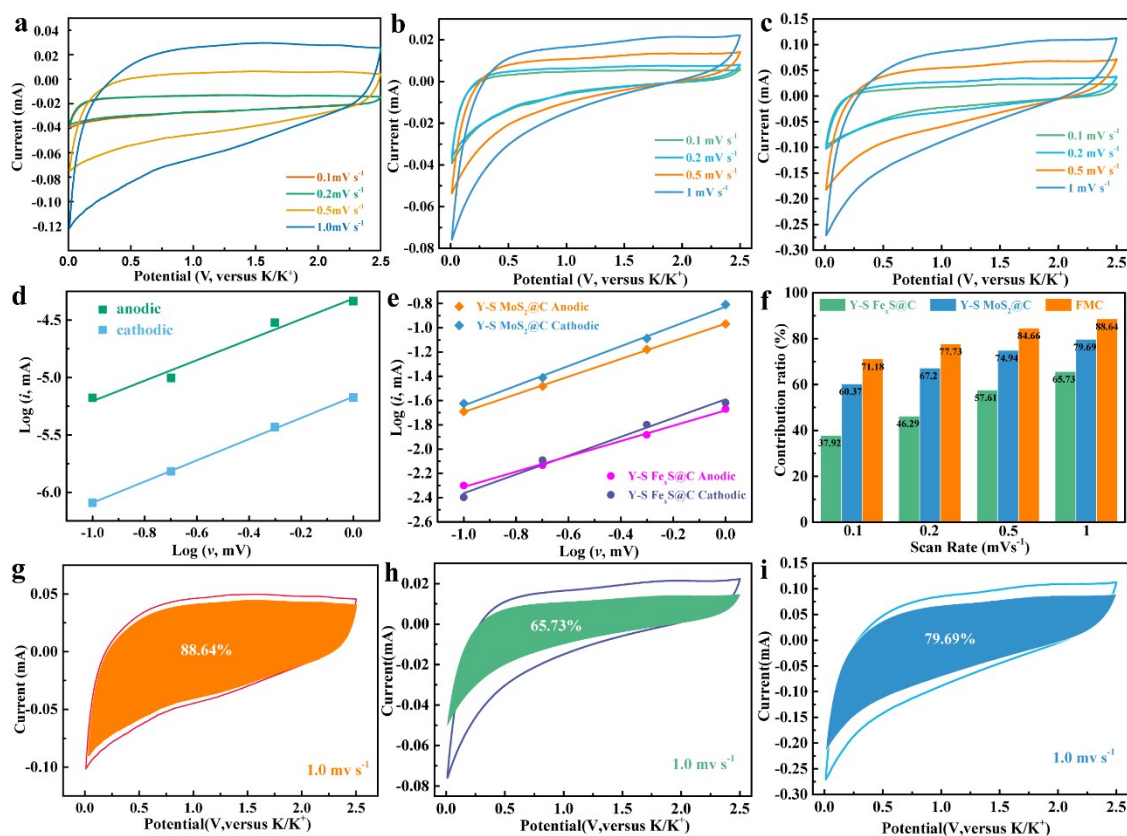

**Fig. S23** Analysis of the capacitive behavior for the FMC, Y-S  $\text{Fe}_x\text{S}@C$  and Y-S  $\text{MoS}_2@C$  electrodes. CV profiles of the (a) FMC, (b) Y-S  $\text{Fe}_x\text{S}@C$  and (c) Y-S  $\text{MoS}_2@C$  electrodes at different scan rates from 0.1 to 1.0  $\text{mV s}^{-1}$  at the voltage window between 0.01 and 2.5 V (*versus*  $\text{K}^+/\text{K}$ ). Determination of the b-value according to the relationship between peak current and scan rate for (d) FMC, (e) Y-S  $\text{Fe}_x\text{S}@C$  and Y-S  $\text{MoS}_2@C$  electrodes, respectively. (f) Contribution ratios of the capacitive and diffusion-controlled capacities at different scan rates for FMC, Y-S  $\text{Fe}_x\text{S}@C$  and Y-S  $\text{MoS}_2@C$  electrodes. CV curves of the capacitive contribution to the total current at 1  $\text{mV s}^{-1}$  for (g) FMC, (h) Y-S  $\text{Fe}_x\text{S}@C$  and (i) Y-S  $\text{MoS}_2@C$  electrodes.



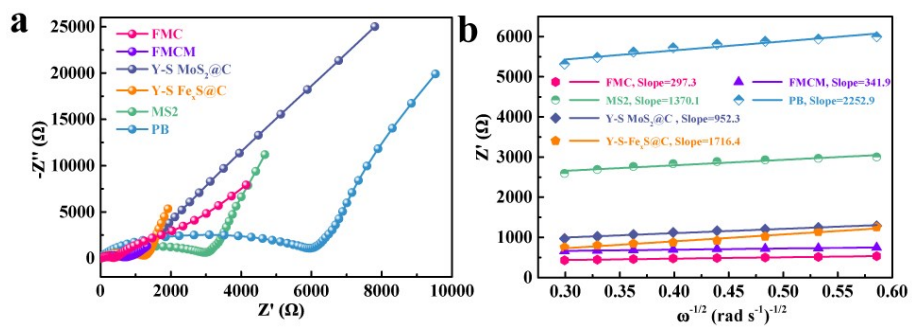

**Fig. S24** (a) Nyquist impedance plots and (b) liner relationship between real impedance and reciprocal square root with low frequency for FMC, FMCM, Y-S  $\text{MoS}_2$ @C, Y-S  $\text{Fe}_x\text{S}@C$ , MS2 and PB electrodes before cycling.

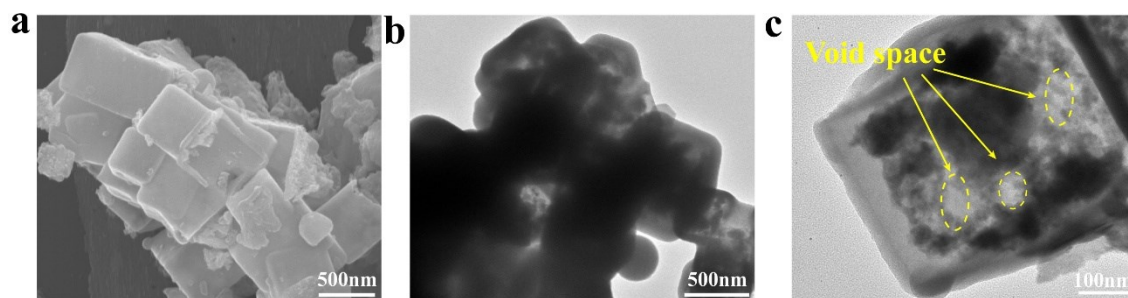

**Fig. S25** (a) FESEM and (b-c) TEM images of the FMC electrode after 200 cycles at 200 mA g<sup>-1</sup>.

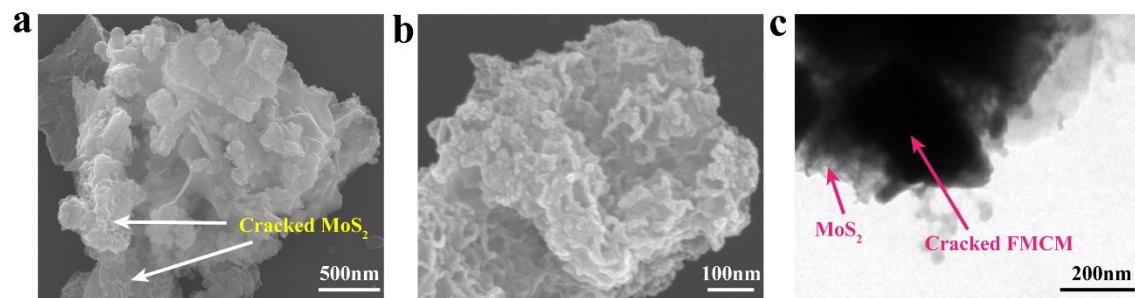

**Fig. S26** (a-b) FESEM and (c) TEM images of the FMCM electrode after 200 cycles at

200

mA

g<sup>-1</sup>.

**Table S1.** Rate performance comparison of some reported carbon-based and sulfides materials anode of KIBs.

| Anode materials                       | Rate        | Capacity   | Rate       | Capacity   | Reference        |
|---------------------------------------|-------------|------------|------------|------------|------------------|
| <b>FMC</b>                            | <b>50</b>   | <b>407</b> | <b>100</b> | <b>350</b> | <b>This work</b> |
|                                       | <b>200</b>  | <b>328</b> | <b>500</b> | <b>295</b> |                  |
|                                       | <b>1000</b> | <b>281</b> |            |            |                  |
| FeP@CNBs                              | 200         | 156        | 500        | 101        | Ref [S1]         |
|                                       | 1000        | 65         |            |            |                  |
| Sn <sub>4</sub> P <sub>3</sub> @C     | 100         | 378        | 200        | 330        | Ref [S2]         |
|                                       | 300         | 292        | 500        | 255        |                  |
|                                       | 1000        | 219        |            |            |                  |
| FeS <sub>2</sub> @G@CNF               | 200         | 332        | 500        | 243        | Ref [S3]         |
|                                       | 1000        | 171        |            |            |                  |
| MoS <sub>2</sub> @SnO <sub>2</sub> @C | 100         | 345        | 200        | 276        | Ref [S4]         |
|                                       | 500         | 153        | 800        | 86         |                  |
| CoP@NPPC                              | 100         | 134        | 200        | 123        | Ref [S5]         |
|                                       | 500         | 94         | 1000       | 74         |                  |
| MoS <sub>2</sub> /N-doped-C           | 200         | 238        | 500        | 204        | Ref [S6]         |
|                                       | 1000        | 171        |            |            |                  |
| Fe <sub>3</sub> C@PGC-NGF             | 100         | 310        | 200        | 252        | Ref [S7]         |
|                                       | 500         | 226        | 1000       | 195        |                  |
| MoSe <sub>2</sub> /N-C                | 200         | 224        | 500        | 211        | Ref [S8]         |
|                                       | 1000        | 195        |            |            |                  |
| CoS@CNFs                              | 200         | 167        | 400        | 104        | Ref [S9]         |
|                                       | 800         | 75         |            |            |                  |

**Table S2.** Cycling stability comparison of some reported anode materials of KIBs.

| Anode materials                       | Cycling stability                                                                                                                                                                                                                                                             | Reference        |
|---------------------------------------|-------------------------------------------------------------------------------------------------------------------------------------------------------------------------------------------------------------------------------------------------------------------------------|------------------|
| <b>FMC</b>                            | <b>342 mAh g<sup>-1</sup> for 100 cycles at 100 mA g<sup>-1</sup></b><br><b>289 mAh g<sup>-1</sup> for 200 cycles at 200 mA g<sup>-1</sup></b><br><b>232 mAh g<sup>-1</sup> for 10000 cycles at 1000 mA g<sup>-1</sup></b>                                                    | <b>This work</b> |
| FeP@CNBs                              | 205 mAh g <sup>-1</sup> for 100 cycles at 100 mA g <sup>-1</sup>                                                                                                                                                                                                              | Ref [S1]         |
| Sn <sub>4</sub> P <sub>3</sub> @C     | 315 mAh g <sup>-1</sup> for 100 cycles at 20 mA g <sup>-1</sup><br>182 mAh g <sup>-1</sup> for 800 cycles at 500 mA g <sup>-1</sup>                                                                                                                                           | Ref [S2]         |
| SnS <sub>2</sub> @rGO                 | 204 mAh g <sup>-1</sup> for 300 cycles at 1000 mA g <sup>-1</sup>                                                                                                                                                                                                             | Ref [S10]        |
| FeS <sub>2</sub> @G@CNF               | 205 mAh g <sup>-1</sup> for 100 cycles at 200 mA g <sup>-1</sup><br>120 mAh g <sup>-1</sup> for 680 cycles at 1000 mA g <sup>-1</sup>                                                                                                                                         | Ref [S3]         |
| G@Y-S FeS <sub>2</sub> @C             | 308 mAh g <sup>-1</sup> for 100 cycles at 300 mA g <sup>-1</sup><br>162 mAh g <sup>-1</sup> for 1000 cycles at 1000 mA g <sup>-1</sup>                                                                                                                                        | Ref [S11]        |
| MoS <sub>2</sub> @SnO <sub>2</sub> @C | 312 mAh g <sup>-1</sup> for 25 cycles at 50 mA g <sup>-1</sup><br>250 mAh g <sup>-1</sup> for 20 cycles at 100 mA g <sup>-1</sup>                                                                                                                                             | Ref [S4]         |
| NiS <sub>2</sub> @C@C                 | 303 mAh g <sup>-1</sup> for 100 cycles at 50 mA g <sup>-1</sup><br>117 mAh g <sup>-1</sup> for 200 cycles at 500 mA g <sup>-1</sup>                                                                                                                                           | Ref [S12]        |
| CoP@NPPC                              | 127 mAh g <sup>-1</sup> after 1000 cycles at 100 mA g <sup>-1</sup><br>114 mAh g <sup>-1</sup> for 1000 cycles at 500 mA g <sup>-1</sup>                                                                                                                                      | Ref [S5]         |
| MoS <sub>2</sub> /N-doped-C           | 330 mAh g <sup>-1</sup> for 50 cycles at 50 mA g <sup>-1</sup><br>248 mAh g <sup>-1</sup> after 100 cycles at 100 mA g <sup>-1</sup><br>212 mAh g <sup>-1</sup> for 100 cycles at 200 mA g <sup>-1</sup><br>151 mAh g <sup>-1</sup> for 1000 cycles at 500 mA g <sup>-1</sup> | Ref [S6]         |
| MoSe <sub>2</sub> /C                  | 226 mAh g <sup>-1</sup> after 1000 cycles at 1000 mA g <sup>-1</sup>                                                                                                                                                                                                          | Ref [S8]         |

---

**Table S3** Kinetic parameters of FMC, FMCM, Y-S MoS<sub>2</sub>@C, Y-S Fe<sub>x</sub>S@C, MS2 and PB electrodes.

| Sample                  | $\sigma_w$ [ $\Omega$ s <sup>-0.5</sup> ] | $D_{K^+}$ [cm <sup>2</sup> s <sup>-1</sup> ] |
|-------------------------|-------------------------------------------|----------------------------------------------|
| FMC                     | 297.3                                     | $8.06 \times 10^{-15}$                       |
| FMCM                    | 341.9                                     | $2.94 \times 10^{-15}$                       |
| Y-S MoS <sub>2</sub> @C | 952.3                                     | $1.19 \times 10^{-16}$                       |
| Y-S Fe <sub>x</sub> S@C | 1078                                      | $8.98 \times 10^{-17}$                       |
| MS2                     | 1370.1                                    | $5.79 \times 10^{-17}$                       |
| PB                      | 2252.9                                    | $3.43 \times 10^{-16}$                       |

---

## Supplementary References

- [1] Yang, F.; Gao, H.; Hao, J.; Zhang, S.; Li, P.; Liu, Y.; Chen, J.; Guo, Z., Yolk–Shell Structured FeP@C Nanoboxes as Advanced Anode Materials for Rechargeable Lithium-/Potassium-Ion Batteries. *Adv. Funct. Mater.* **2019**, *29* (16), 1808291.
- [2] Li, D.; Zhang, Y.; Sun, Q.; Zhang, S.; Wang, Z.; Liang, Z.; Si, P.; Ci, L., Hierarchically porous carbon supported Sn<sub>4</sub>P<sub>3</sub> as a superior anode material for potassium-ion batteries. *Energy Storage Mater.* **2019**, *23*, 367-374.
- [3] Chen, C.; Yang, Y.; Tang, X.; Qiu, R.; Wang, S.; Cao, G.; Zhang, M., Graphene-Encapsulated FeS<sub>2</sub> in Carbon Fibers as High Reversible Anodes for Na(+)/K(+) Batteries in a Wide Temperature Range. *Small* **2019**, *15* (10), e1804740.
- [4] Chen, Z.; Yin, D.; Zhang, M., Sandwich-like MoS<sub>2</sub>@SnO<sub>2</sub>@C with High Capacity and Stability for Sodium/Potassium Ion Batteries. *Small* **2018**, *14* (17), e1703818.
- [5] Bai, J.; Xi, B.; Mao, H.; Lin, Y.; Ma, X.; Feng, J.; Xiong, S., One-Step Construction of N,P-Codoped Porous Carbon Sheets/CoP Hybrids with Enhanced Lithium and Potassium Storage. *Adv. Mater.* **2018**, *30* (35), e1802310.
- [6] Jia, B.; Yu, Q.; Zhao, Y.; Qin, M.; Wang, W.; Liu, Z.; Lao, C.-Y.; Liu, Y.; Wu, H.; Zhang, Z.; Qu, X., Bamboo-Like Hollow Tubes with MoS<sub>2</sub>/N-Doped-C Interfaces Boost Potassium-Ion Storage. *Adv. Funct. Mater.* **2018**, *28* (40), 1803409.
- [7] Han, K.; Liu, Z.; Li, P.; Yu, Q.; Wang, W.; Lao, C.-Y.; He, D.; Zhao, W.; Suo, G.; Guo, H.; Song, L.; Qin, M.; Qu, X., High-throughput fabrication of 3D N-doped graphenic framework coupled with Fe<sub>3</sub>C@porous graphite carbon for ultrastable potassium ion storage. *Energy Storage Mater.* **2019**, *22*, 185-193.
- [8] Ge, J.; Fan, L.; Wang, J.; Zhang, Q.; Liu, Z.; Zhang, E.; Liu, Q.; Yu, X.; Lu, B., MoSe<sub>2</sub>/N-Doped Carbon as Anodes for Potassium-Ion Batteries. *Adv. Energy Mater.* **2018**, *8* (29), 1801477.
- [9] Miao, W.; Zhang, Y.; Li, H.; Zhang, Z.; Li, L.; Yu, Z.; Zhang, W., ZIF-8/ZIF-67-derived 3D amorphous carbon-encapsulated CoS/NCNTs supported on CoS-coated carbon nanofibers as an advanced potassium-ion battery anode. *J. Mater. Chem. A* **2019**, *7* (10), 5504-5512.

---

[10]Chen, X.; Zhang, H.; Ci, C.; Sun, W.; Wang, Y., Few-Layered Boronic Ester Based Covalent Organic Frameworks/Carbon Nanotube Composites for High-Performance K-Organic Batteries. *ACS Nano* **2019**, *13* (3), 3600-3607.

[11]Zhao, Y.; Zhu, J.; Ong, S. J. H.; Yao, Q.; Shi, X.; Hou, K.; Xu, Z. J.; Guan, L., High-Rate and Ultralong Cycle-Life Potassium Ion Batteries Enabled by In Situ Engineering of Yolk-Shell FeS<sub>2</sub>@C Structure on Graphene Matrix. *Adv. Energy Mater.* **2018**, *8* (36), 1802565.

[12]Yang, L.; Hong, W.; Zhang, Y.; Tian, Y.; Gao, X.; Zhu, Y.; Zou, G.; Hou, H.; Ji, X., Hierarchical NiS<sub>2</sub> Modified with Bifunctional Carbon for Enhanced Potassium-Ion Storage. *Adv. Funct. Mater.* **2019**, *29* (50), 1903454.
